# Supplementary material for: Evolution of group I introns in Porifera: new evidence for intron mobility and implications for DNA barcoding
Source: PubMed Central journal article supplement (PMC5360047; doi:10.1186/s12862-017-0928-9), 2017-03-20
Supplement: 12862_2017_928_MOESM1_ESM.pdf [file 12862_2017_928_MOESM1_ESM.pdf]

**Intron+LAGLIDADG 870 Phylogeny**  
(Bayesian-Topology)

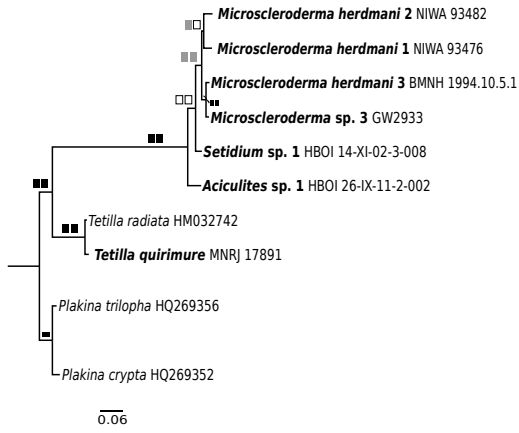

| Bayesian Posterior Probabilities | Maximum Likelihood Bootstrap |
|----------------------------------|------------------------------|
| 0.95 - 1.00                      | 75 - 100                     |
| 0.75 - 0.94                      | 60 - 74                      |
| <0.75                            | <60                          |

- Indian Ocean (Mauritius)
- Pacific (Philippines)
- N-Pacific (Hawaii)
- S-Pacific (Tahiti)
- Caribbean Sea (Bahamas)
- N-Atlantic (Florida)
- S-Atlantic Brazil
- S-Atlantic Brazil
- Mediterranean Sea (France)
- unknown
- unknown
- Mediterranean Sea (France)

**Intron+LAGLIDADG 714 Phylogeny**  
(Bayesian-Topology)

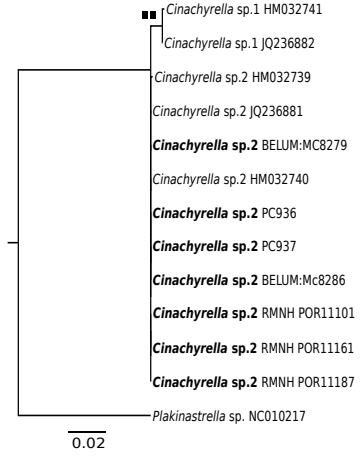

- S-Pacific (Australia)
- Indian Ocean (Australia)
- Indian Ocean (Tanzania)
- Indian Ocean (Australia)
- Indian Ocean (Kenya)
- Indian Ocean (Tanzania)
- Indian Ocean (Myanmar)
- Indian Ocean (Myanmar)
- Indian Ocean (Kenya)
- Pacific (Indonesia)
- Pacific (Indonesia), Marine Lake
- Pacific (Indonesia)
- N-Atlantic (Florida)
